# Supplementary material for: A novel photo-regulated self-healing hydrogel based on hollow SiO2@g-C3N4@TiO2 and PVA
Source: Royal Society of Chemistry journal article supplement (doi:10.1039/d5ra01507c), 2025-01-01
Supplement: d5ra01507c1.pdf [file d5ra01507c1.pdf]

**Supporting information**

**A novel kind of photo-regulated self-healing hydrogel based on  
hollow SiO<sub>2</sub>@g-C<sub>3</sub>N<sub>4</sub>@TiO<sub>2</sub> and PVA**

*Yu-Ling Qi, Hao-Yu Zhou, Guo-Zhi Han\**

*College of Chemistry and Molecular Engineering, Nanjing Tech University, Nanjing, 211816,*

*P.R. China*

**Corresponding Author**

Tel.: +86 139 5193 9398

Email: [han@njtech.edu.cn](mailto:han@njtech.edu.cn)

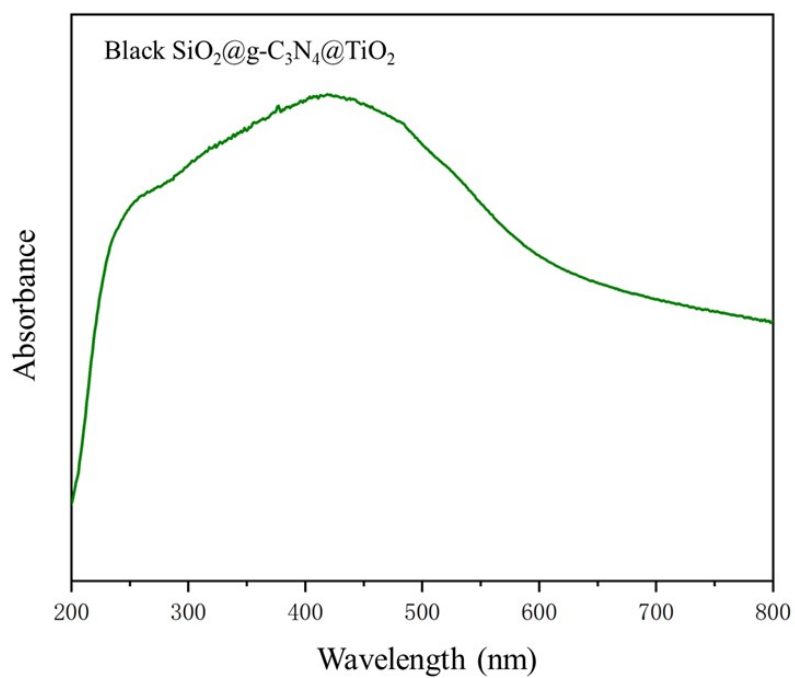

**Figure**

**S1.** The UV-vis diffuse reflectance spectra of black  $\text{SiO}_2@\text{g-C}_3\text{N}_4@\text{TiO}_2$  nanoparticles

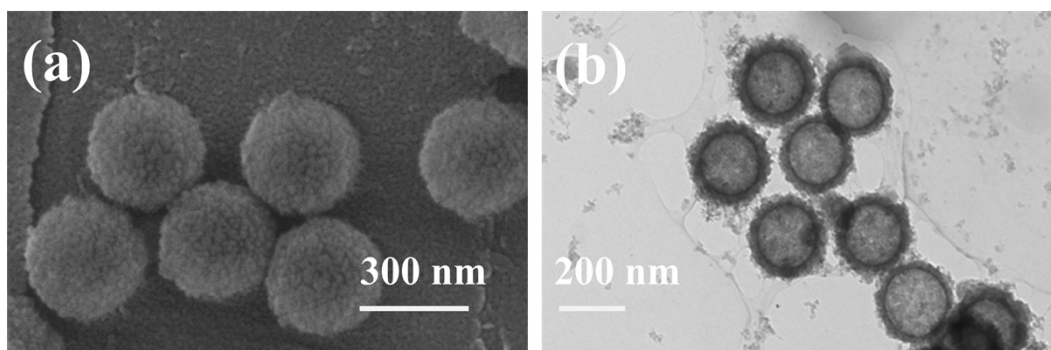

**Figure S2.** SEM and TEM images of the hollow  $\text{SiO}_2@\text{g-C}_3\text{N}_4@\text{TiO}_2$  microspheres and reference samples.

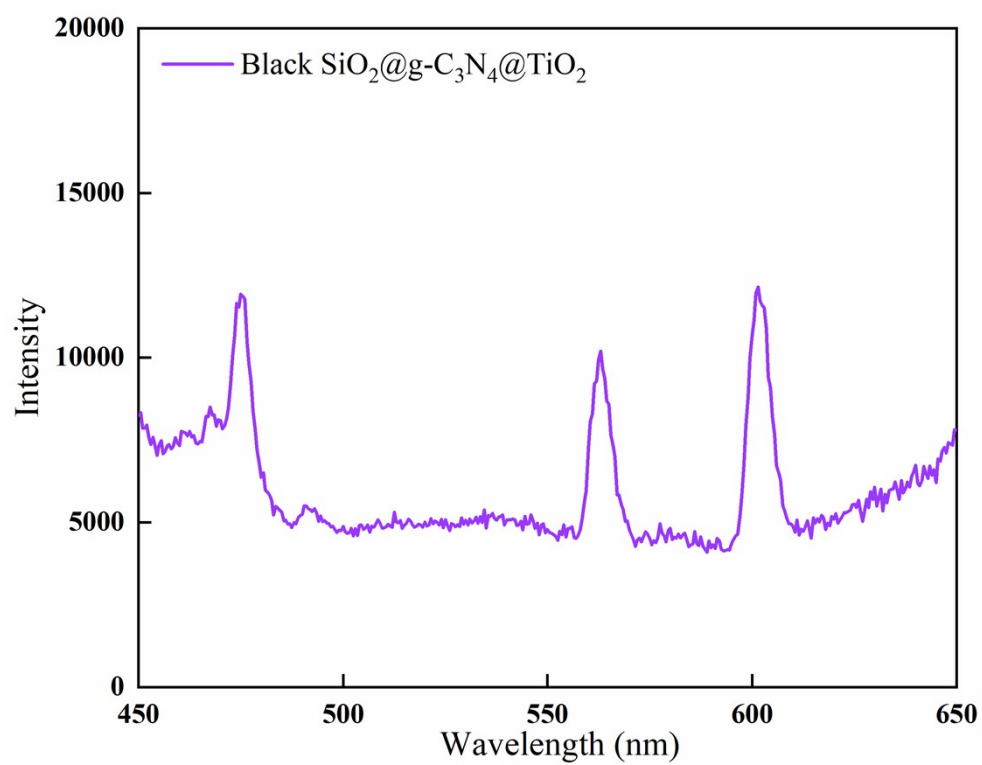

**Figure S3.** PL spectra of the black  $\text{SiO}_2@\text{g-C}_3\text{N}_4@\text{TiO}_2$  nanoparticles.

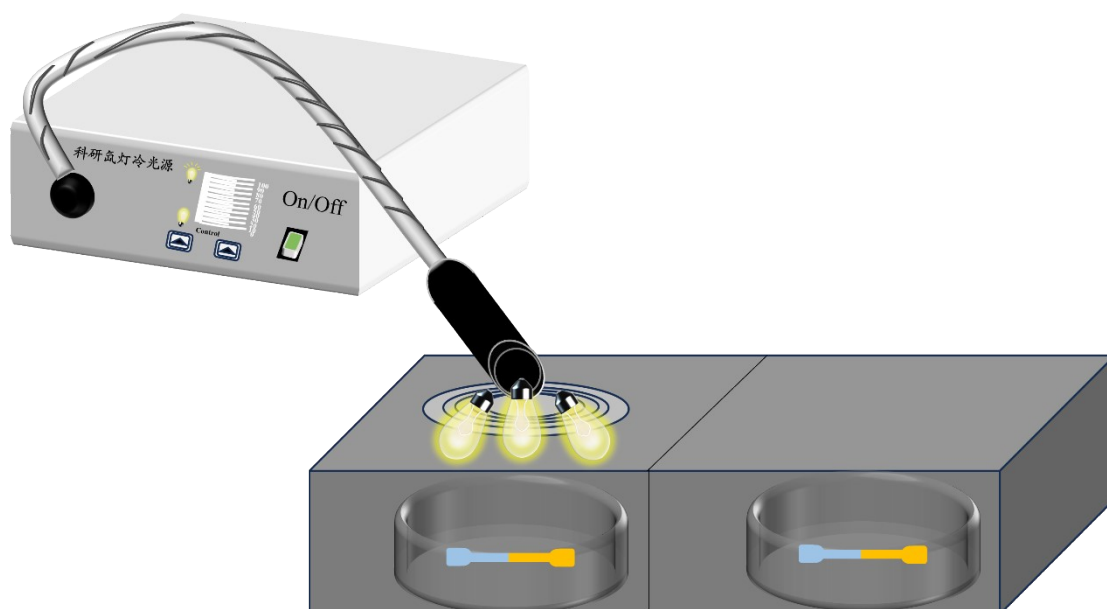

**Figure S4.** Test of self-healing performance of the PBCT hydrogels.

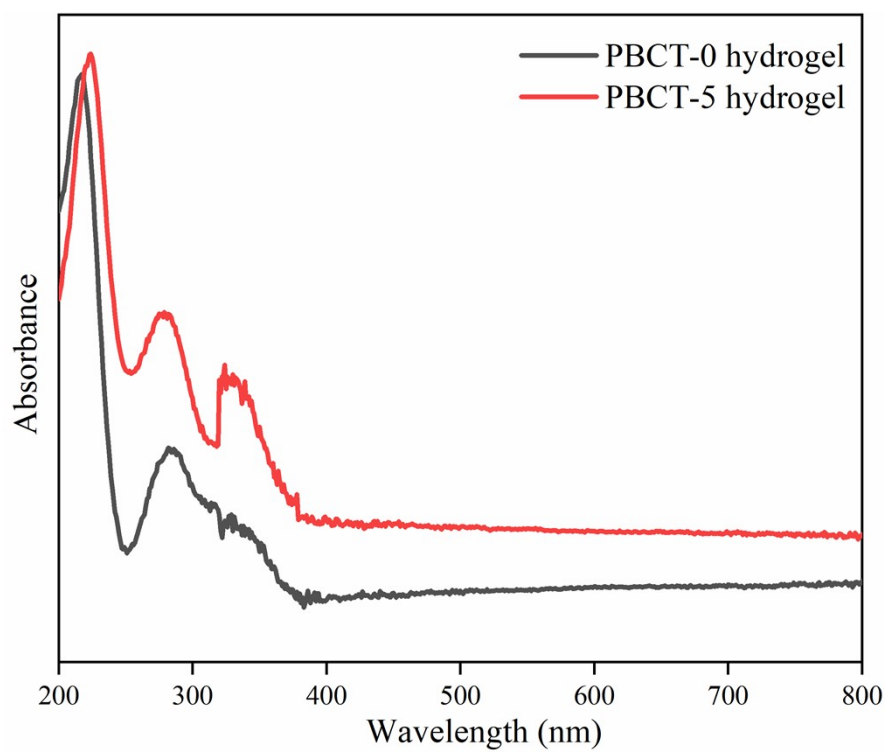

Figure S5. The UV-vis diffuse reflectance spectra of PBCT hydrogels.

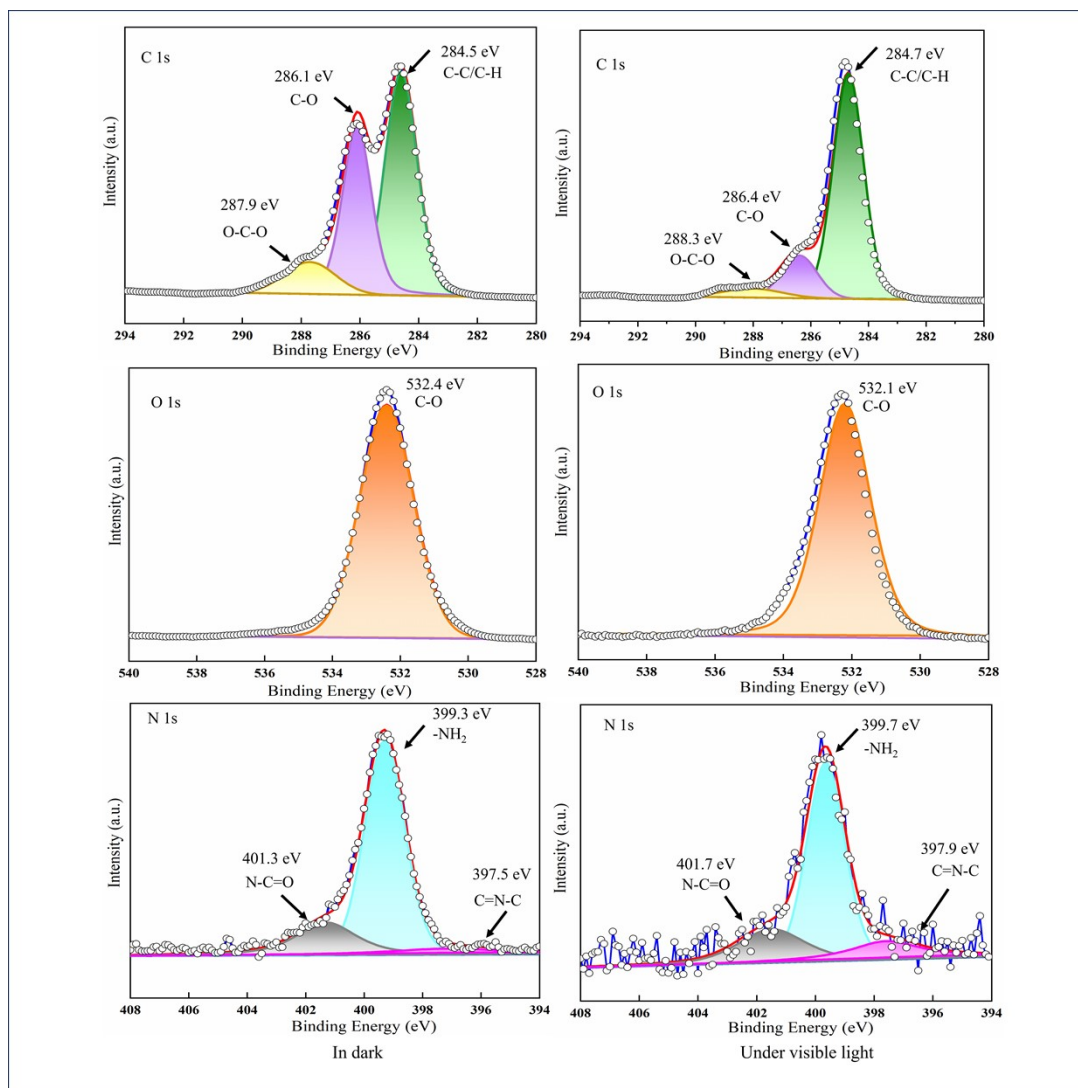

**Figure S6.** XPS spectra of the PBCT-3 hydrogel before visible light irradiation and after visible light irradiation.

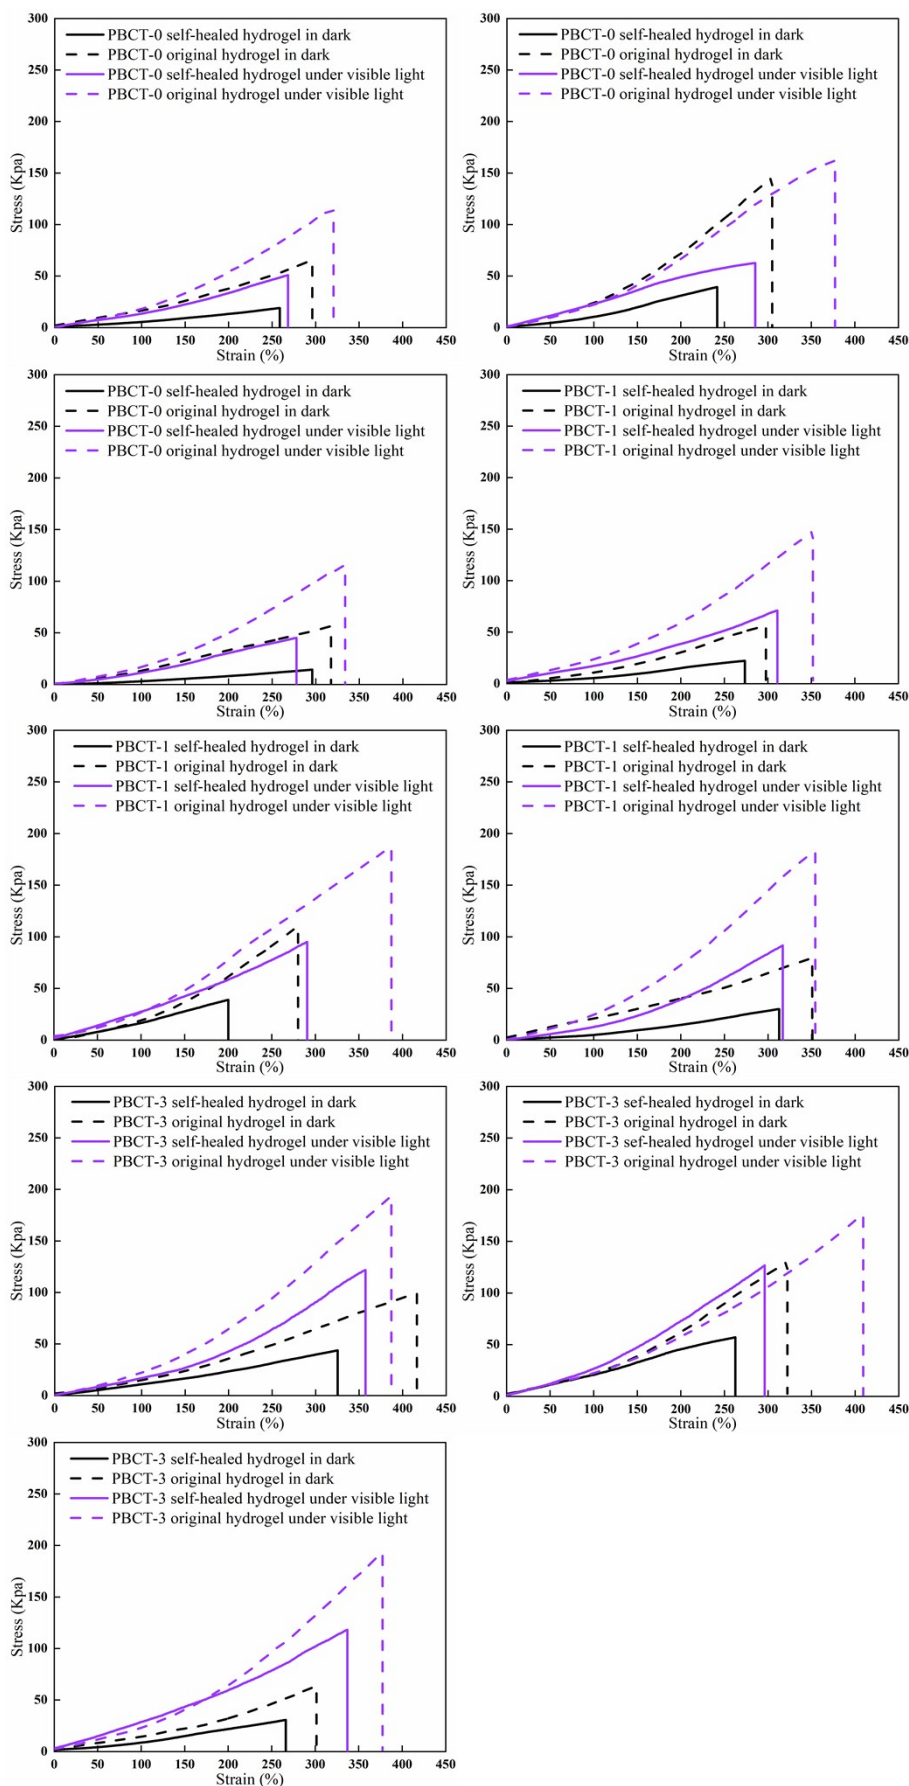

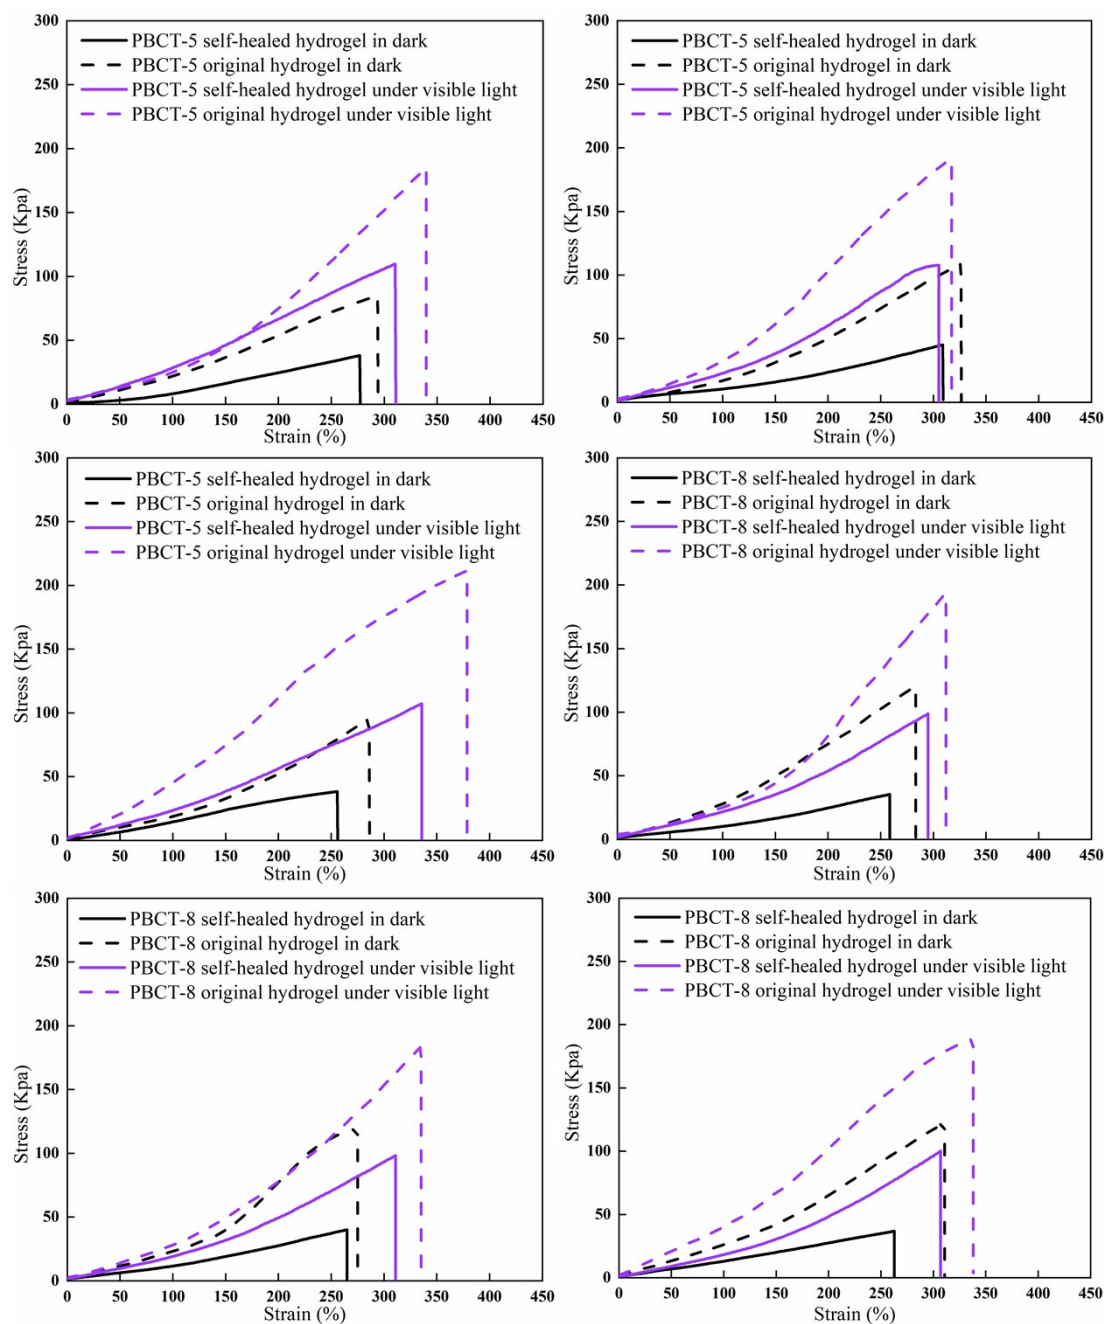

**Figure S7.** Stress-strain curves of the PBCT self-healed hydrogels with different amount of  $\text{SiO}_2@\text{g-C}_3\text{N}_4@\text{TiO}_2$  nanoparticles.

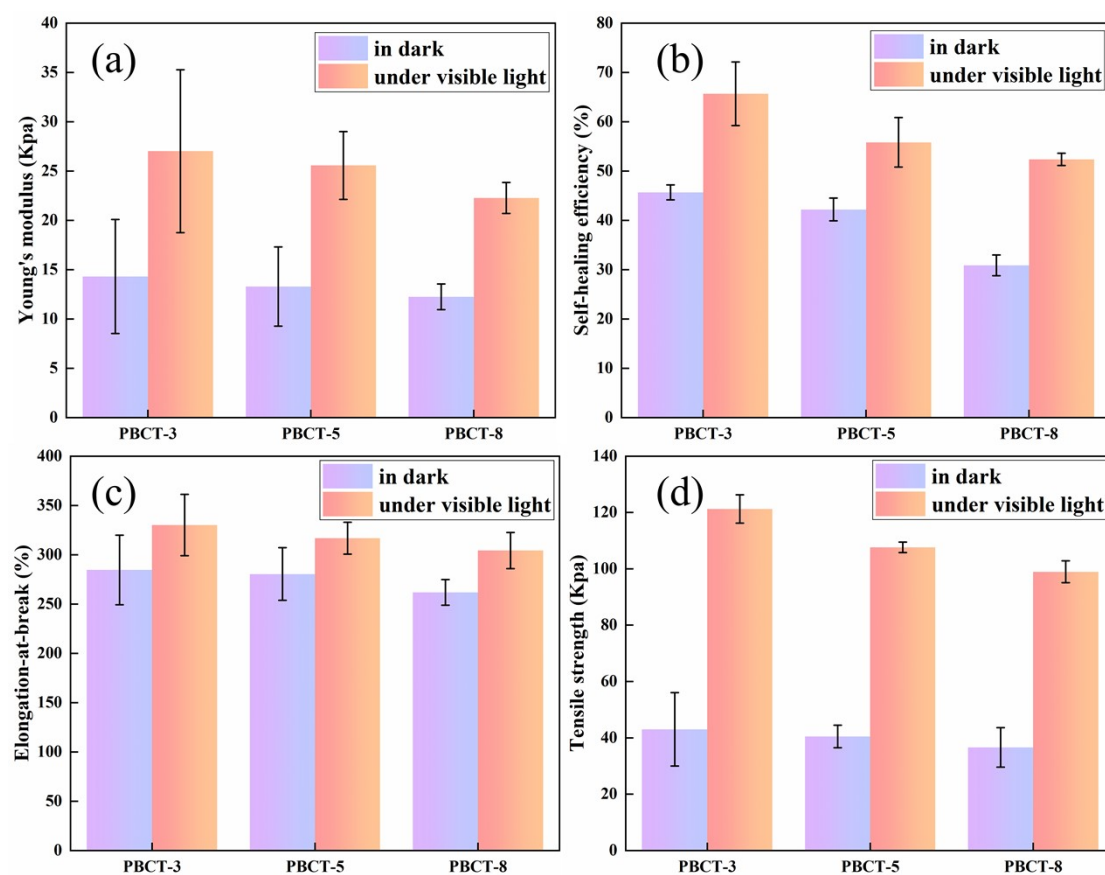

**Figure S8.** Effect of visible light irradiation on the self-healing of the PBCT-3, PBCT-5 and PBCT-8 samples.



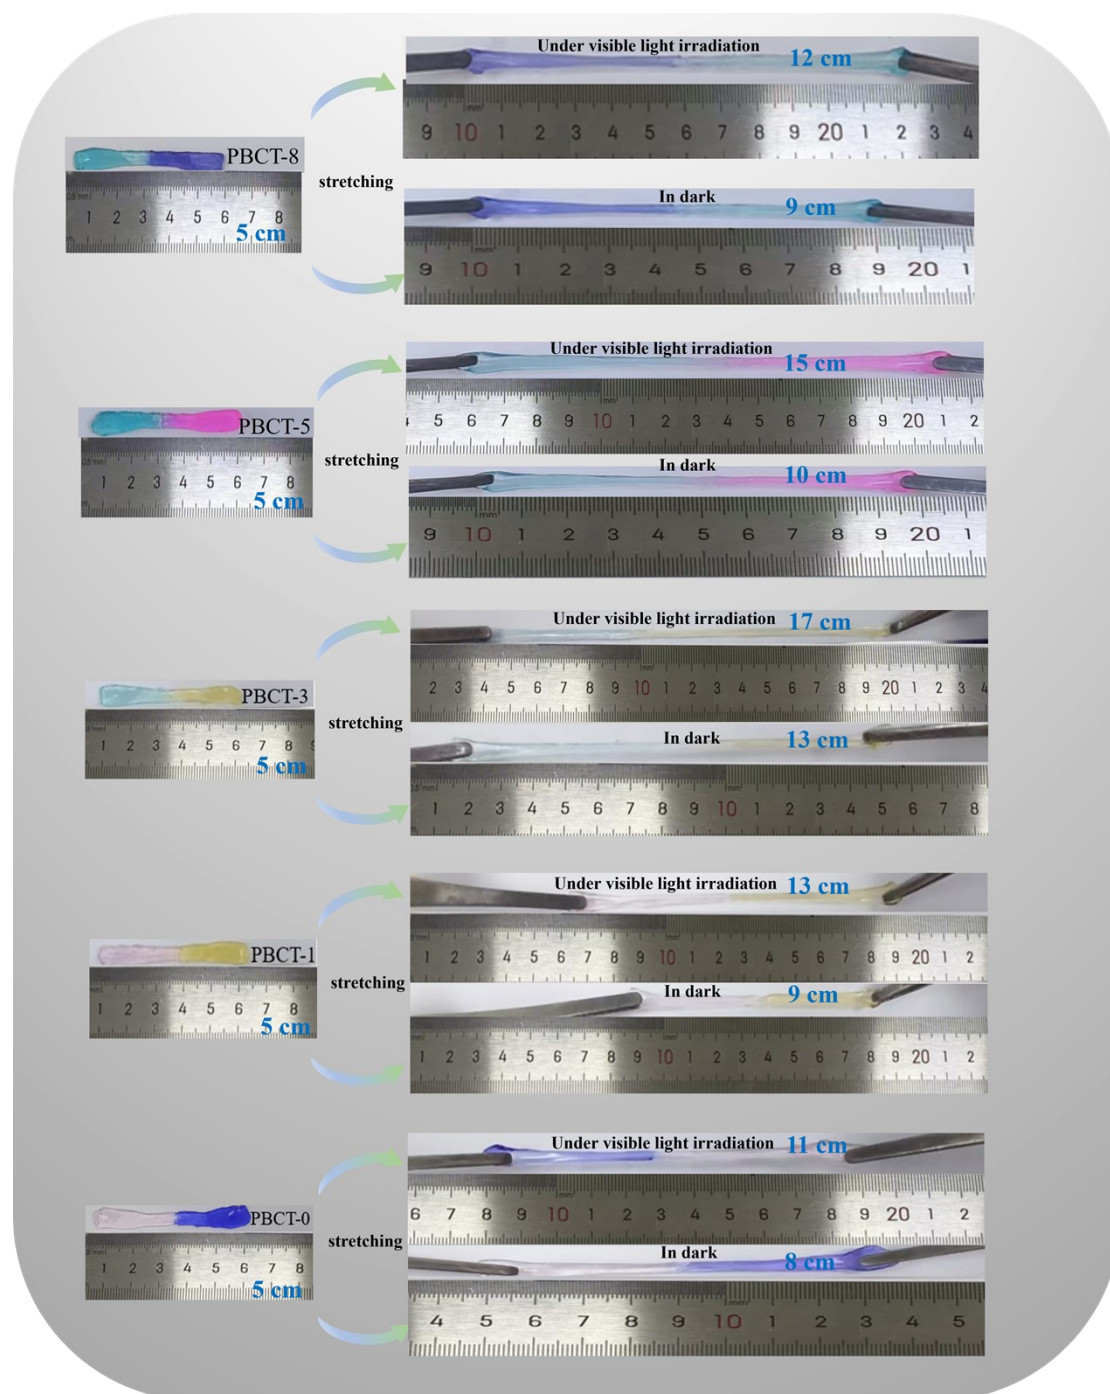

**Figure S9.** Photos of PBCT self-healed hydrogels for stretching in dark and under visible light irradiation respectively.
